# Supplementary material
Source: PubMed Central journal article supplement (PMC3600378)

ER+ / ErbB2-

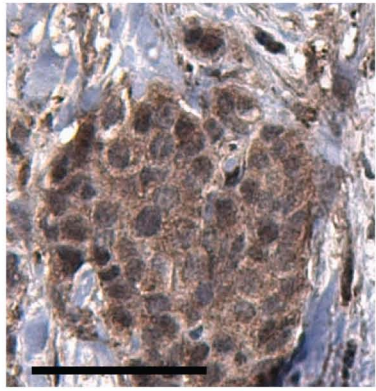

ER- / ErbB2+

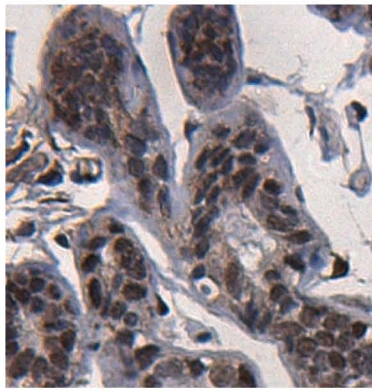

triple negative

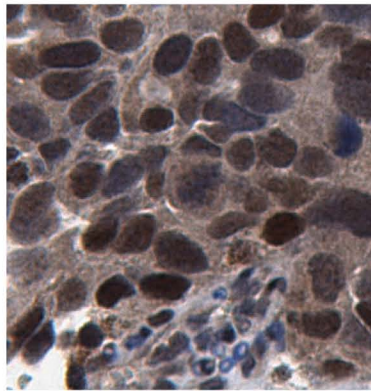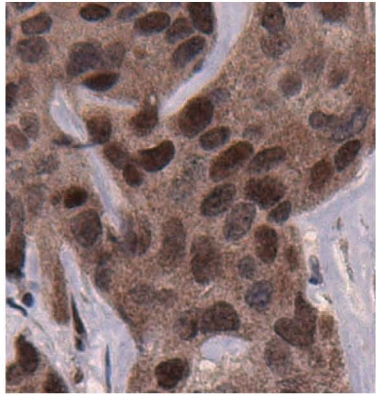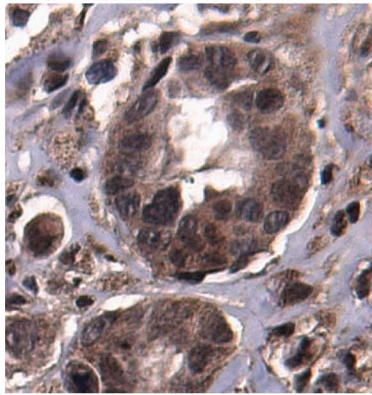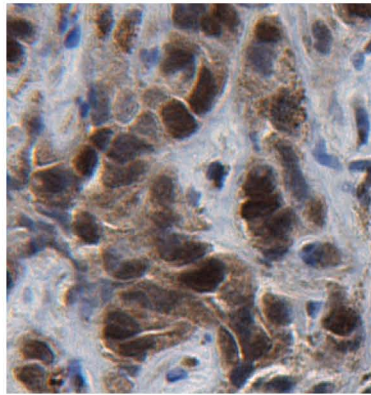

Supplement: NIHMS435365-supplement-Figure_S1.pdf [file NIHMS435365-supplement-Figure_S1.pdf]

**A** MCF-7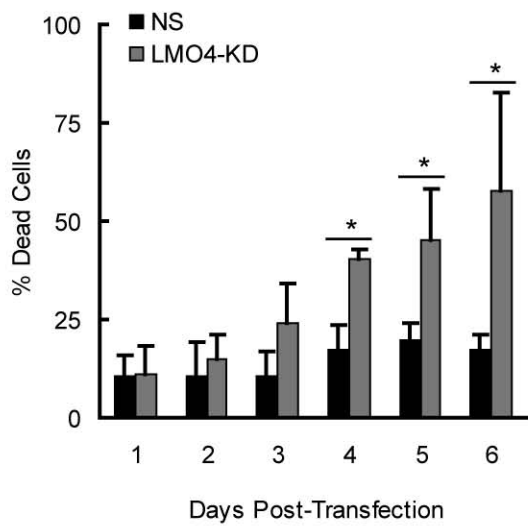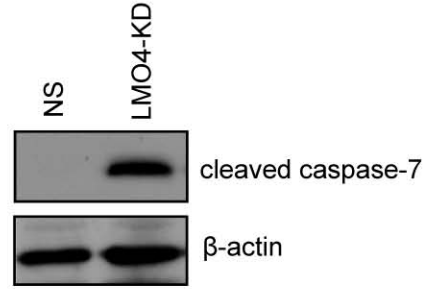**B** MDA-MB-468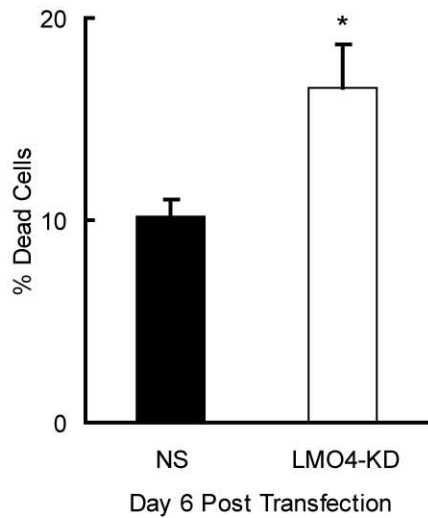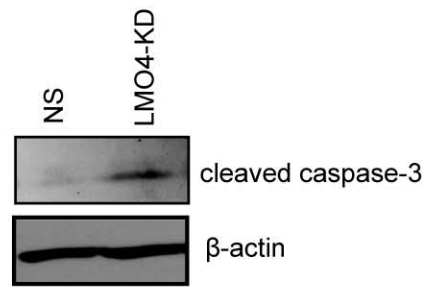**C** BT-549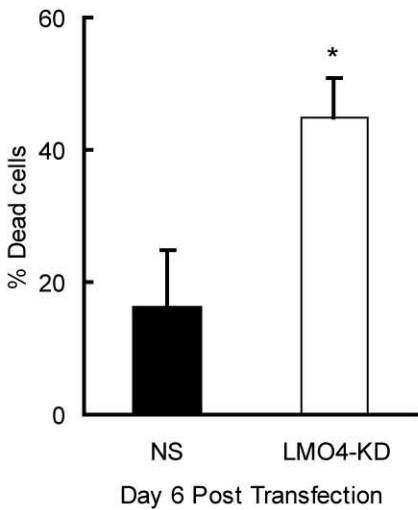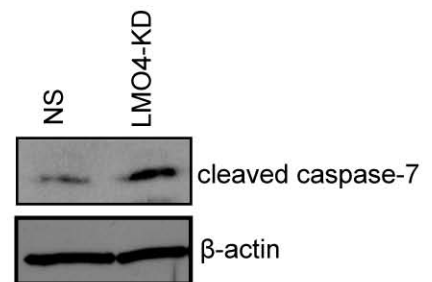

Supplement: NIHMS435365-supplement-Figure_S2.pdf [file NIHMS435365-supplement-Figure_S2.pdf]

T47D

---

LZRS-empty

LZRS-LMO4

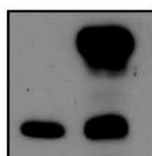

myc-tag LMO4

endogenous LMO4

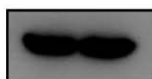

$\beta$ -actin

Supplement: NIHMS435365-supplement-Figure_S3.pdf [file NIHMS435365-supplement-Figure_S3.pdf]

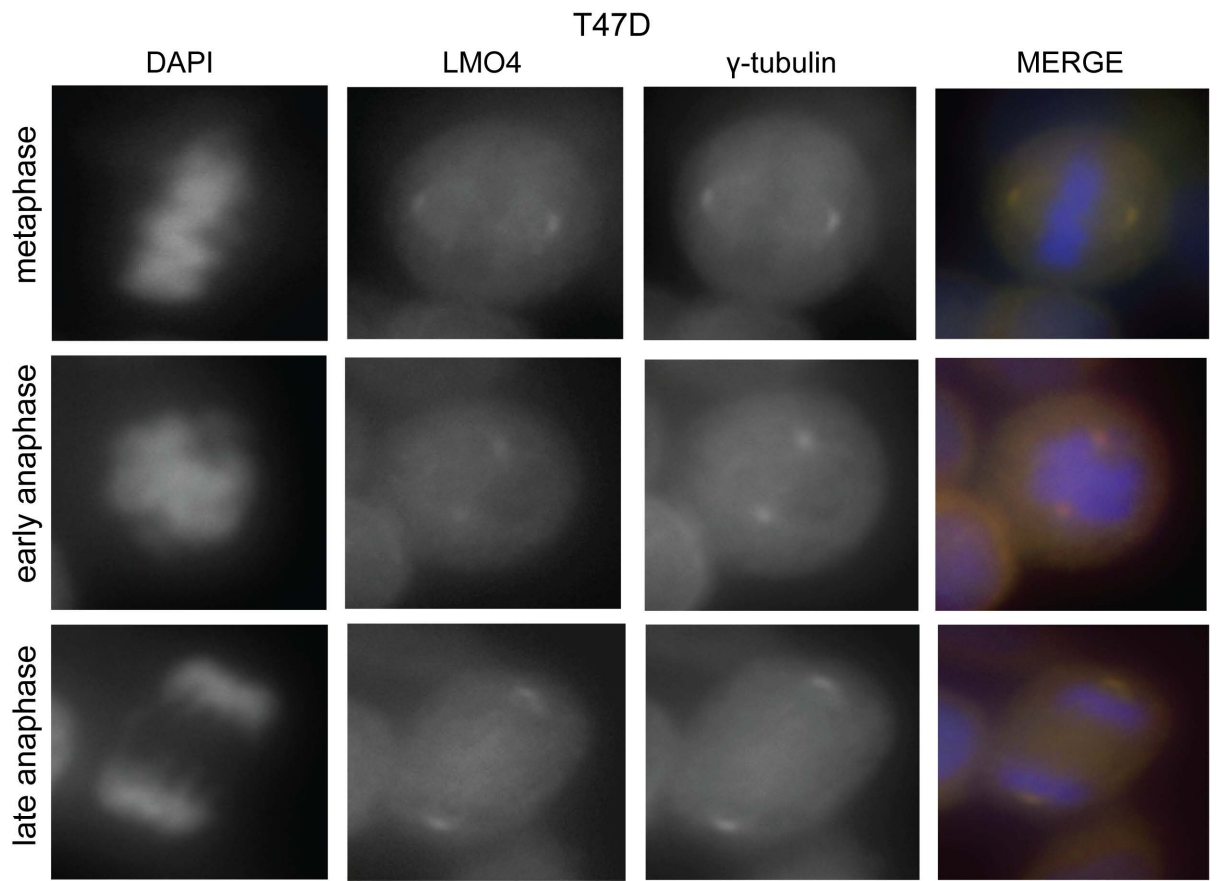

Montanez-Wiscovich Supplemental Figure S4

Supplement: NIHMS435365-supplement-Figure_S4.pdf [file NIHMS435365-supplement-Figure_S4.pdf]
